# Supplementary material for: Aqueous solution synthesis of (Sb, Bi)2(Te, Se)3 nanocrystals with controllable composition and morphology
Source: Royal Society of Chemistry journal article supplement (doi:10.1039/c3tc31241k), 2013-01-01
Supplement: c3tc31241k.pdf [file c3tc31241k.pdf]

## Supporting Information

### Aqueous Solution Synthesis of (Sb,Bi)<sub>2</sub>(Te,Se)<sub>3</sub> Nanocrystals with Controllable Composition and Morphology

*Ziyang Lu,<sup>1</sup> Li Ping Tan,<sup>1</sup> Xiaoxu Zhao,<sup>1</sup> Michael Layani,<sup>2</sup> Ting Sun,<sup>1</sup> Shufen Fan,<sup>1</sup> Qingyu*

*Yan,<sup>1</sup> Shlomo Magdassi<sup>\*2</sup> and Huey Hoon Hng<sup>\*1</sup>*

1. School of Materials Science and Engineering, Nanyang Technological University, 50 Nanyang Ave, Singapore 637819, Singapore

2. Institute of Chemistry, the Hebrew University of Jerusalem, Jerusalem, Israel 91904

\*Corresponding author E-mail: [ashhhng@ntu.edu.sg](mailto:ashhhng@ntu.edu.sg) and [magdassi@mail.huji.ac.il](mailto:magdassi@mail.huji.ac.il)

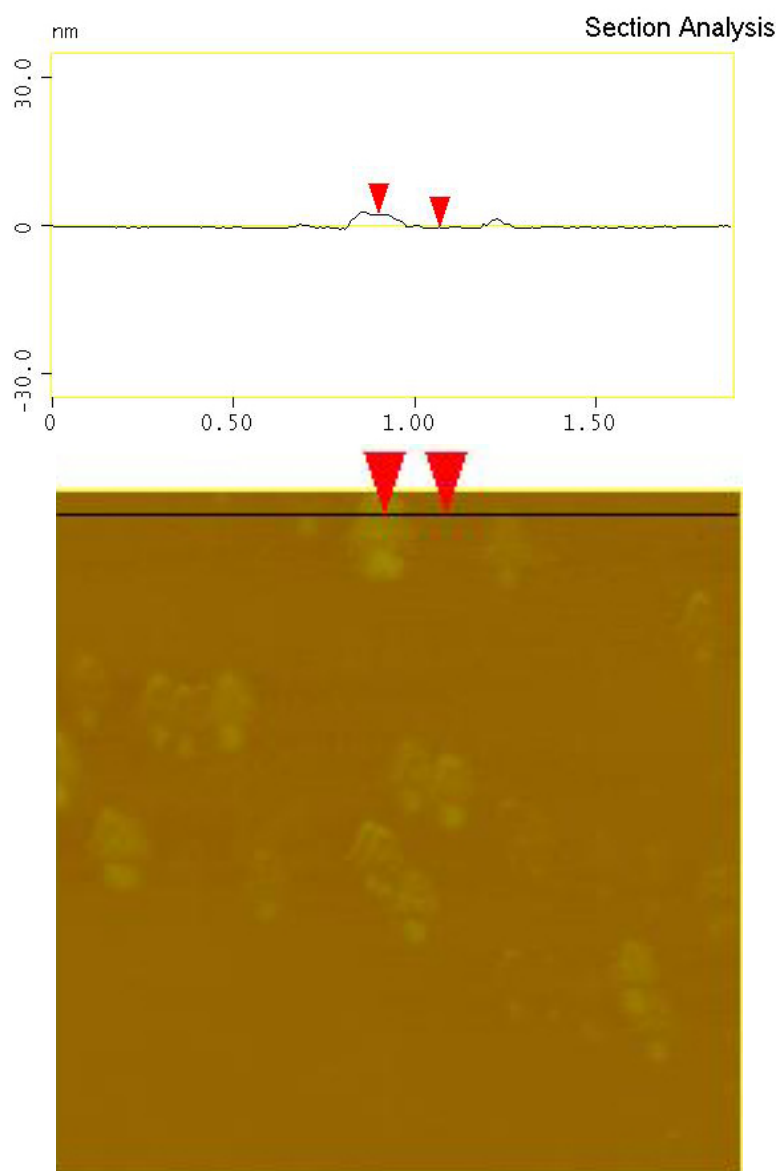

Figure S1 AFM image of the  $\text{Bi}_2\text{Te}_3$  nanosheets on a wafer and its line profile measured along the black line. The thickness of the  $\text{Bi}_2\text{Te}_3$  nanosheet was measured as 2.73 nm.

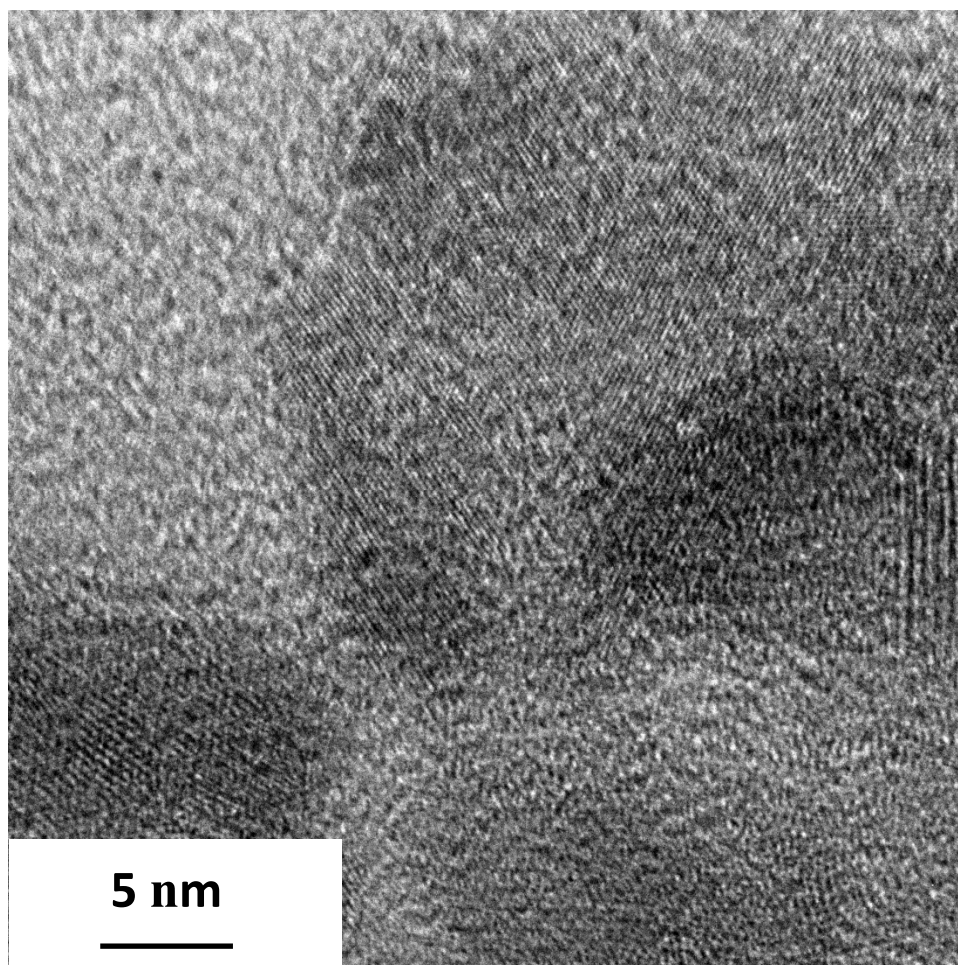

Figure S2 HRTEM images of Bi<sub>2</sub>Te<sub>3</sub> nanosheets formed under reaction at 80 °C for 10 h

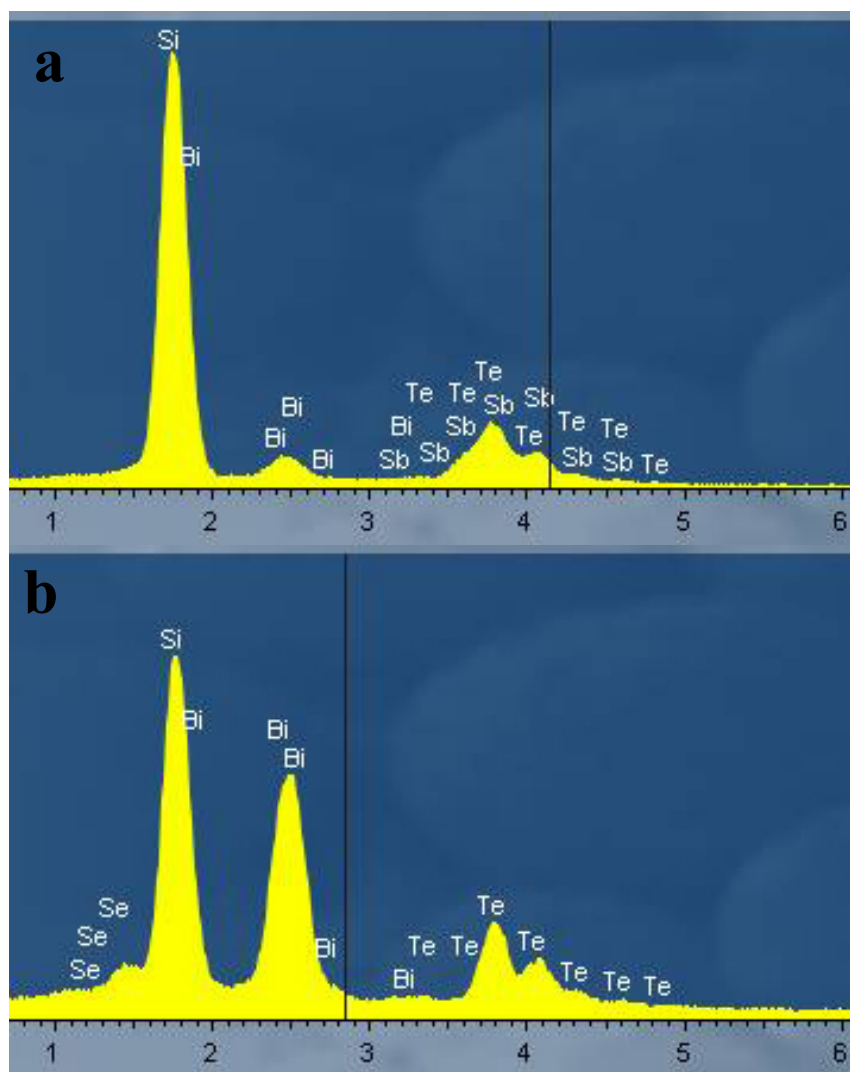

Figure S3 Energy dispersive X-ray (EDX) analysis of the (a)  $\text{Sb}_{1.5}\text{Bi}_{0.5}\text{Te}_3$  and (b)  $\text{Bi}_2\text{Te}_{2.7}\text{Se}_{0.3}$  nanoparticles
